# Supplementary material for: A TNF receptor 2 agonist ameliorates neuropathology and improves cognition in an Alzheimer’s disease mouse model
Source: PubMed Central journal article supplement (PMC9482428; doi:10.1073/pnas.2201137119), 2022-08-29
Supplement: pnas.2201137119.sapp.pdf [file pnas.2201137119.sapp.pdf]

## Supplementary Information for

### **A TNF Receptor 2 agonist ameliorates neuropathology and improves cognition in an Alzheimer's disease mouse model**

Natalia Ortí-Casañ<sup>1</sup>, Inge S. Zuhorn<sup>2</sup>, Petrus J. W. Naudé<sup>1,3</sup>, Peter P. De Deyn<sup>3</sup>, Pauline E.M. van Schaik<sup>4</sup>, Harald Wajant<sup>5</sup> and Ulrich L. M. Eisel<sup>1\*</sup>

<sup>1</sup>Department of Molecular Neurobiology, Groningen Institute for Evolutionary Life Sciences, University of Groningen, Groningen 9747 AG, Netherlands

<sup>2</sup>Department of Biomedical Engineering, University of Groningen, University Medical Center Groningen, Groningen 9713 AV, Netherlands

<sup>3</sup>Department of Neurology and Alzheimer Center, University of Groningen, University Medical Center Groningen, Groningen 9713 AV, Netherlands

<sup>4</sup>Department of Biomedical Sciences of Cells & Systems, Section Molecular Neurobiology, University of Groningen, University Medical Center Groningen, Groningen 9713 AV, the Netherlands.

<sup>5</sup>Department of Internal Medicine II, University of Würzburg, Würzburg 97070, Germany

\*Correspondence and material requests should be addressed to U.E ([u.l.m.eisel@rug.nl](mailto:u.l.m.eisel@rug.nl)).

#### **This PDF file includes:**

Figures S1 to S5  
Table S1

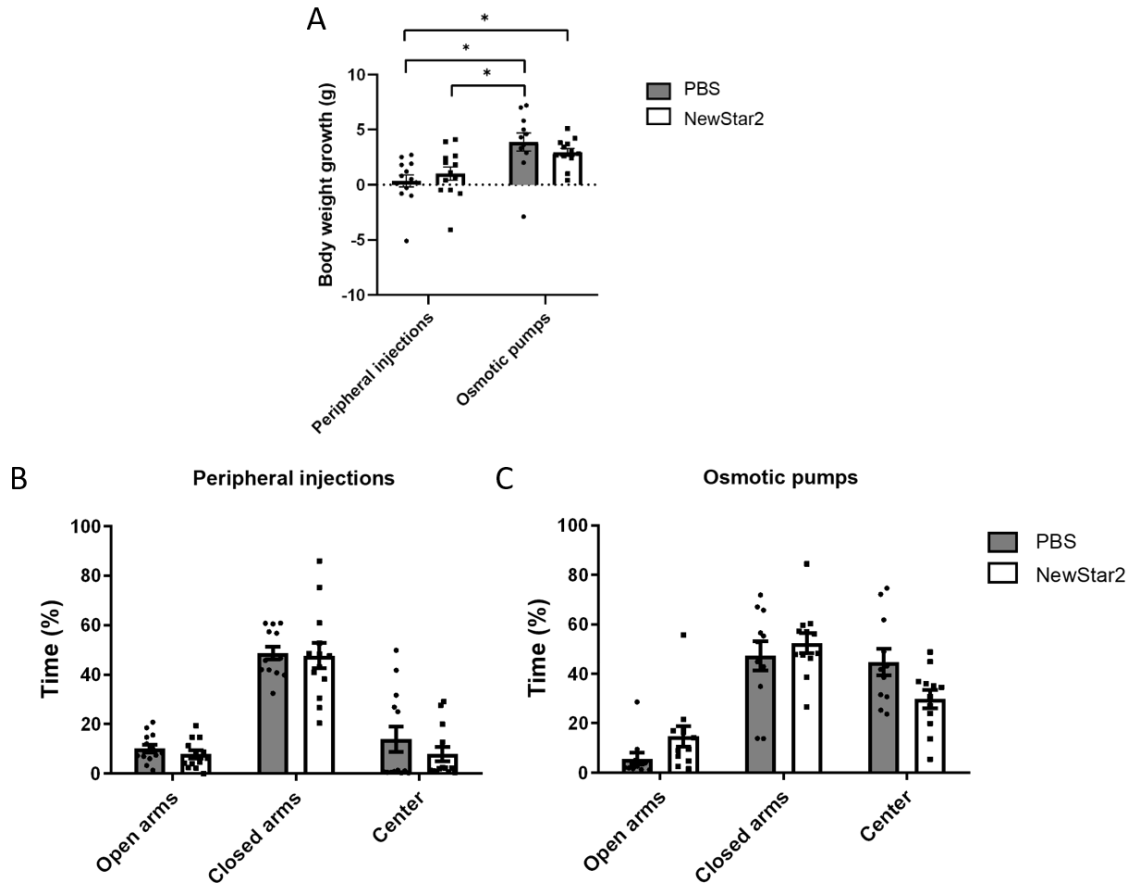

**Fig. S1.** NewStar2 does not affect body weight changes nor anxiety-like behavior. **A** NewStar2 was administered either systemically or centrally and body weight growth was measured (IP injections (PBS, n=13; NewStar2, n=13); Osmotic pumps (PBS, n=11; NewStar2, n=12)), two-way ANOVA, Bonferroni post hoc analysis ( $F_{1,45}=20.21$ ;  $DF=1$ ). **B, C** Measurement of anxiety-like behavior in the EPM test (IP injections (PBS, n=13; NewStar2, n=13); two-way ANOVA, Bonferroni post hoc analysis ( $F_{2,72}=0.26$ ;  $DF=2$ ); Osmotic pumps (PBS, n=11; NewStar2, n=12), two-way ANOVA, Bonferroni post hoc analysis ( $F_{2,63}=4.33$ ;  $DF=2$ )). Data are presented as mean  $\pm$  SEM. \* $p<0.05$

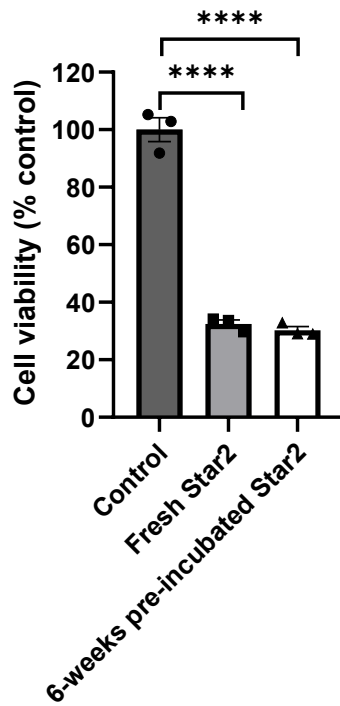

**Fig. S2.** Stability of NewStar2 is intact after 6-weeks incubation at 37°C. Fresh or 6-weeks pre-incubated NewStar2 was added to kym-1 cells for 24h and cell viability was measured using the crystal violet assay. Data are presented as mean  $\pm$  SEM. Each condition was analyzed in triplicates, one-way ANOVA ( $F_{2,6}=227.22$ ;  $DF=2$ ). \*\*\*\* $p<0.0001$ .

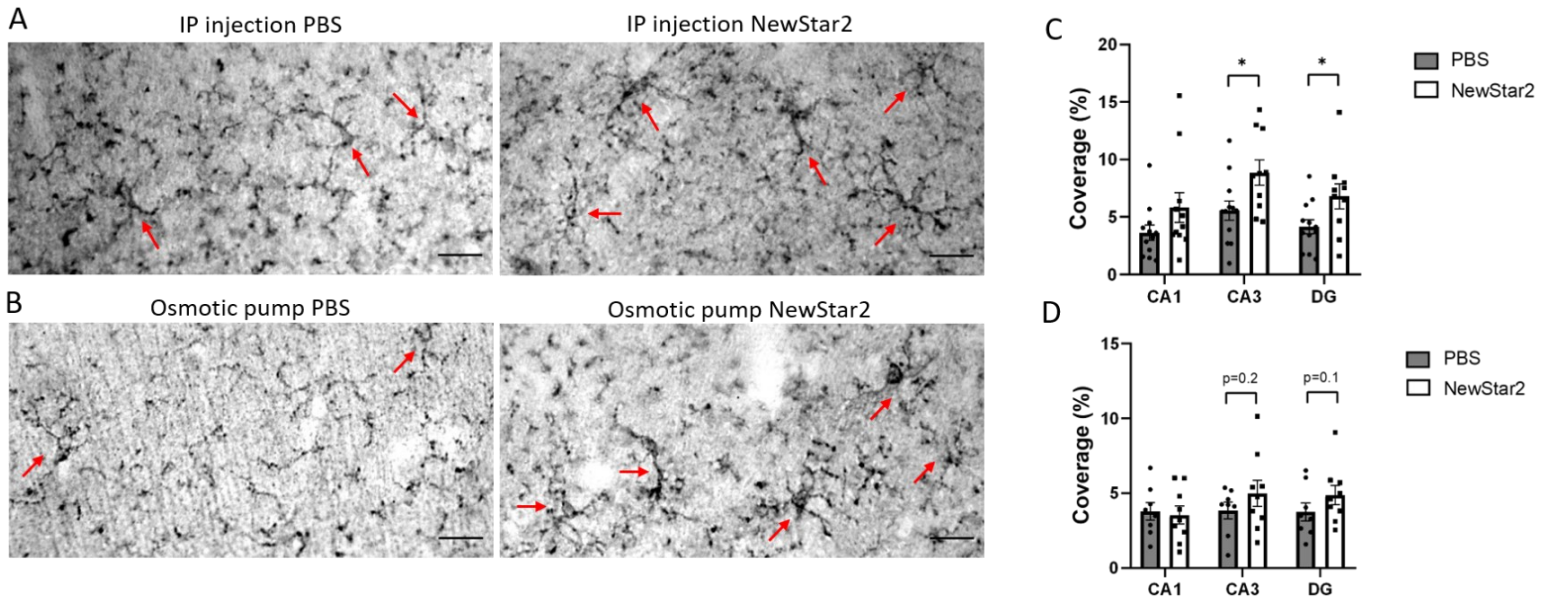

**Fig. S3.** Peripheral administration of NewStar2 leads to increased expression levels of P2RY12. **A** PBS vs. NewStar2 administration via IP injections or **B** osmotic pumps. Representative images of dentate gyrus are shown. Scale bar, 50  $\mu$ m. **C** Quantification of resting microglia (P2RY12) coverage from CA1, CA3 and DG in **A** (IP injections (PBS, n=12; NewStar2, n=11), two-way ANOVA, Bonferroni post hoc analysis ( $F_{1, 63}=12.49$ ;  $DF=1$ )). **D** Quantification of P2RY12 coverage from CA1, CA3 and DG in **B** (Osmotic pumps (PBS, n=8; NewStar2, n=9), two-way ANOVA, Bonferroni post hoc analysis ( $F_{1, 45}=1.54$ ;  $DF=1$ )). Data are presented as mean  $\pm$  SEM. \* $p < 0.05$ .

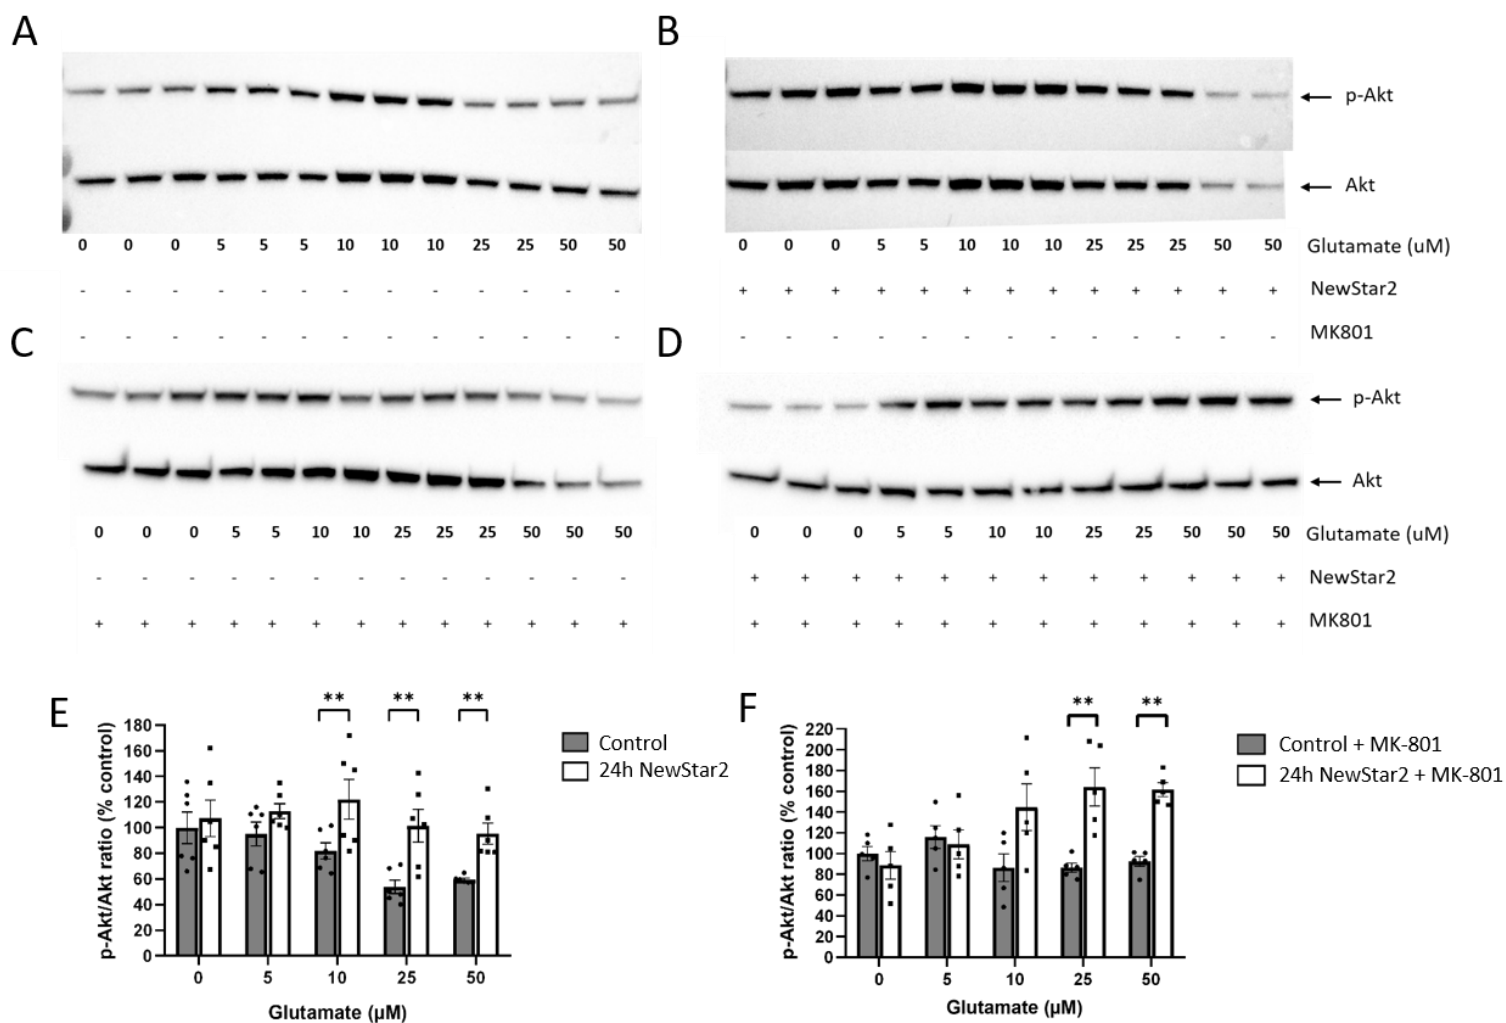

**Fig. S4.** Neuroprotective effect of NewStar2 in primary cortical neurons. Primary cortical neurons were pre-treated with NewStar2 for 24h and incubated with increasing toxic doses of glutamate with or without MK-801. PKB/Akt phosphorylation was measured in neuronal lysates using Western Blot. **A, B** Protein levels of p-Akt and Akt were measured by Western Blot in absence of MK801. **E** Quantification of p-Akt/Akt ratio (% control) from **A, B**; two-way ANOVA, Bonferroni post hoc analysis ( $F_{1,50}=21.90$ ;  $DF=1$ ). **C, D** Protein levels of p-Akt and Akt were measured by Western Blot in presence of MK801. **F** Quantification of p-Akt/Akt ratio (% control) from **C, D**; two-way ANOVA, Bonferroni post hoc analysis ( $F_{1,40}=17.96$ ;  $DF=1$ ). Data are presented as mean  $\pm$  SEM. Each condition was analyzed in triplicates (**E**) or duplicates (**F**) from two different experiments. \*\*p<0.01.

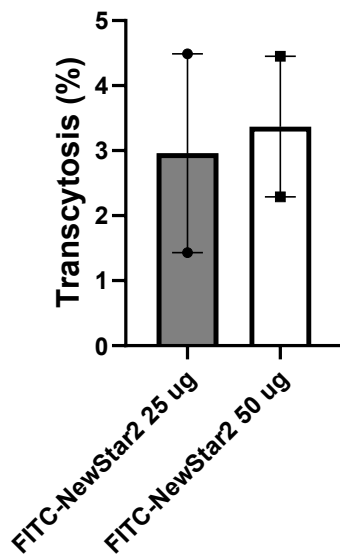

**Fig. S5.** NewStar2 crosses the blood-brain-barrier (BBB) in an *in vitro* BBB transcytosis model. 25 or 50  $\mu\text{g}$  of FITC-NewStar2 was added apically to a hCMEC/D3 cells monolayer and the retrieved basal FITC-NewStar2 was used to calculate the percentage of transcytosis (%). Data are presented as mean  $\pm$  SEM. Each condition was analyzed in duplicates from two different experiments.

**Table S1.** Primers used for genotyping of J20

| Target               | Forward                               | Reverse                              |
|----------------------|---------------------------------------|--------------------------------------|
| J20 internal control | 5'- CAA ATG TTG CTT GTC TGG<br>TG-3'  | 5'- GTC AGT CGA GTG CAC<br>AGT TT-3' |
| J20 transgene        | 5'- GGT GAG TTT GTA AGT<br>GAT GCC-3' | 5'- TCT TCT TCT TCC ACC TCA<br>GC-3' |
